# Supplementary material for: Interdisciplinary Methods for Zoonotic Tissue Acellularization for Natural Heart Valve Substitute of Biomimetic Materials
Source: MDPI journal article supplement (doi:10.3390/ma15072594), 2022-04-01
Supplement: s1 [file s1]

## Supplementary Materials

**Table S1.** Parameters of pericardium sample irradiation.

| Sample nr | Wavelength (nm) | Pulse Energy (mJ) | Repetition rate (Hz) | Number of pulses in single exposure |
|-----------|-----------------|-------------------|----------------------|-------------------------------------|
| 1         | 532             | 215               | 1                    | 1                                   |
| 2         |                 |                   |                      |                                     |
| 3         |                 |                   |                      |                                     |
| 4         |                 |                   |                      |                                     |
| 5         | 532             | 215               | 1                    | 2                                   |
| 6         |                 |                   |                      |                                     |
| 7         |                 |                   |                      |                                     |
| 8         |                 |                   |                      |                                     |
| 9         | 532             | 215               | 1                    | 5                                   |
| 10        |                 |                   |                      |                                     |
| 11        |                 |                   |                      |                                     |
| 12        |                 |                   |                      |                                     |
| 13        | 532             | 215               | 1                    | 10                                  |

**Table S2.** Parameters of pericardium and aortic valve sample irradiation.

| Sample nr | Wavelength (nm) | Pulse Energy (mJ) | Repetition rate (Hz) | Number of pulses in single exposure |
|-----------|-----------------|-------------------|----------------------|-------------------------------------|
| 1         | 532             | 240               | 1                    | 1                                   |
| 2         |                 |                   |                      | 3                                   |
| 3         |                 |                   |                      | 5                                   |
| 4         |                 |                   |                      | 10                                  |
| 5         | 532             | 240               | 1                    | 1                                   |
| 6         |                 |                   |                      | 3                                   |
| 7         |                 |                   |                      | 5                                   |
| 8         |                 |                   |                      | 10                                  |
| 9         | 532             | 240               | 1                    | 1                                   |
| 10        |                 |                   |                      | 3                                   |
| 11        |                 |                   |                      | 5                                   |
| 12        |                 |                   |                      | 10                                  |
| 13        | 532             | 240               | 1                    | 1                                   |
| 14        |                 |                   |                      | 3                                   |
| 15        |                 |                   |                      | 5                                   |
| 16        |                 |                   |                      | 10                                  |

**Table S3.** Parameters of tissue sample irradiation: 1a-8b and 0a-0b – aorta, 8c – aortic valve, 8d – aortic valve leaflet.

| Sample nr | Wavelength (nm)                     | Pulse Energy (mJ) | Repetition rate (Hz) | Number of pulses in single exposure |      |
|-----------|-------------------------------------|-------------------|----------------------|-------------------------------------|------|
| 1a        | 532                                 | 40                | 5                    | 500                                 |      |
| 1b        |                                     |                   |                      |                                     |      |
| 2a        |                                     |                   |                      | 1000                                |      |
| 2b        |                                     |                   |                      |                                     |      |
| 3a        | 532                                 | 20                | 5                    | 500                                 |      |
| 3b        |                                     |                   |                      |                                     |      |
| 4a        |                                     |                   |                      | 1000                                |      |
| 4b        |                                     |                   |                      |                                     |      |
| 5a        |                                     |                   |                      | 2000                                |      |
| 5b        |                                     |                   |                      |                                     |      |
| 6a        |                                     |                   |                      |                                     | 500  |
| 6b        |                                     |                   |                      |                                     |      |
| 7a        |                                     |                   |                      |                                     | 1000 |
| 7b        |                                     |                   |                      |                                     |      |
| 8a        |                                     | 10                |                      |                                     |      |
| 8b        |                                     |                   |                      |                                     | 2000 |
| 8c        |                                     |                   |                      |                                     |      |
| 8d        |                                     |                   |                      |                                     |      |
| 0a        | Native tissue (without irradiation) |                   |                      |                                     |      |
| 0b        |                                     |                   |                      |                                     |      |

**Table S4.** Parameters of pericardium sample exposure to near Gaussian beam.

| Sample nr | Pulse Energy (mJ) | Laser spot size (mm) | Fluency (J/cm <sup>2</sup> ) | Repetition rate (Hz) | Number of pulses in single exposure |
|-----------|-------------------|----------------------|------------------------------|----------------------|-------------------------------------|
| 1         | 240               | 4.8                  | 1.3                          | 1                    | 4                                   |
| 2         |                   | 2.3                  | 5.7                          |                      | 4                                   |
| 3         |                   | 2.3                  | 5.7                          |                      | 2                                   |
| 4         |                   | 2.3                  | 5.7                          |                      | 2                                   |
| 5         |                   | 0.8                  | 48                           |                      | 2                                   |

**Table S5.** Parameters of tissue sample irradiation at 1064 nm: AA - aortic aorta, XA - aorta, XZ - aortic valve of the aorta.

| Sample nr | Wavelength (nm) | Pulse Energy (mJ) | Fluency (J/cm <sup>2</sup> ) | Repetition rate (Hz) | Number of pulses in single exposure |
|-----------|-----------------|-------------------|------------------------------|----------------------|-------------------------------------|
| AA1       | 1064            | 65                | 0.17                         | 5                    | 100                                 |
| AA2       |                 |                   |                              |                      | 50                                  |
| XA3       |                 |                   |                              |                      | 10                                  |
| XA4       |                 |                   |                              |                      | 200                                 |
| XA5       |                 |                   |                              |                      | 500                                 |
| XA6       |                 |                   |                              | 1                    | 100                                 |
| XZ7       |                 |                   |                              | 5                    | 100                                 |
| XZ8       |                 |                   |                              | 5                    | 100                                 |
| AA9       |                 |                   |                              |                      | 100                                 |

|      |   |     |
|------|---|-----|
| AA10 | 1 | 100 |
| AA11 |   | 200 |
| AA12 |   | 200 |
| AA13 | 5 | 500 |
| AA14 |   | 50  |
| AA15 |   | 10  |

**Table S6.** Parameters of tissue sample irradiation at 532 nm: AA - aortic root XA - aorta, XZ - aortic valve.

| Sample nr | Wavelength (nm) | Pulse Energy (mJ) | Fluency (J/cm <sup>2</sup> ) | Repetition rate (Hz) | Number of pulses in single exposure |
|-----------|-----------------|-------------------|------------------------------|----------------------|-------------------------------------|
| AA16      | 532             | 62                | 0.12                         | 5                    | 500                                 |
| AA17      |                 |                   |                              |                      | 200                                 |
| AA18      |                 |                   |                              |                      | 100                                 |
| AA19      |                 |                   |                              |                      | 100                                 |
| AA20      |                 |                   | 0.06                         | 1                    | 50                                  |
| AA21      |                 |                   |                              |                      | 10                                  |
| XZ22      |                 |                   |                              |                      | 100                                 |
| AX23      |                 |                   |                              | 5                    | 500                                 |
| AX24      |                 |                   |                              |                      | 200                                 |
| AX25      |                 |                   |                              |                      | 100                                 |
| AX26      |                 |                   |                              |                      | 100                                 |
| AX27      |                 |                   |                              | 1                    | 50                                  |
| AX28      |                 |                   |                              |                      | 10                                  |
| AX29      |                 |                   |                              |                      | 500                                 |
| AX30      |                 |                   |                              | 5                    | 200                                 |
| AX31      |                 |                   |                              |                      | 100                                 |
| AX32      |                 |                   |                              |                      | 100                                 |
| AX33      |                 |                   | 32                           | 1                    | 50                                  |
| AX34      |                 |                   |                              |                      | 10                                  |
| AX35      |                 |                   |                              |                      | 500                                 |
| AA36      |                 |                   |                              | 5                    | 200                                 |
| AA37      |                 |                   |                              |                      | 100                                 |
| AA38      |                 |                   |                              |                      | 100                                 |
| AA39      |                 |                   |                              | 1                    | 50                                  |
| AA40      |                 |                   |                              |                      | 10                                  |

**Table S7.** Parameters of tissue sample irradiation: AA – aorta, ZA - aortic valve.

| Sample nr | Pulse Energy (mJ) | Fluency (J/cm <sup>2</sup> ) | Repetition rate (Hz) | Number of pulses in single exposure |
|-----------|-------------------|------------------------------|----------------------|-------------------------------------|
| -1-       | -2-               | -3-                          | -4-                  | -5-                                 |
| AA0       | Native tissue     |                              |                      |                                     |
| AA1       | 15                | 76                           | 1                    | 600                                 |
| AA2       |                   |                              |                      | 1000                                |
| ZA3       |                   |                              |                      |                                     |

|      |      |                                  |   |       |
|------|------|----------------------------------|---|-------|
| ZA4  |      |                                  |   |       |
| ZA5  |      | Reference sample – native valve  |   |       |
| AA6  |      | Reference sample – native tissue |   |       |
| AA7  |      |                                  |   |       |
| ZA8  | 15   | 76                               | 2 | 2000  |
| ZA9  |      |                                  |   |       |
| ZA10 |      |                                  |   |       |
| AA11 | 15   | 76                               | 5 | 2000  |
| ZA12 |      |                                  |   |       |
| AA13 | 15   | 76                               | 5 | 3000  |
| ZA14 |      |                                  |   |       |
| AA15 | 11   | 56                               | 5 | 3000  |
| ZA16 |      |                                  |   |       |
| AA17 |      |                                  |   |       |
| AA18 |      |                                  |   |       |
| AA19 |      |                                  |   |       |
| AA20 |      |                                  |   |       |
| AA21 |      |                                  |   |       |
| AA22 |      |                                  |   |       |
| AA23 | 11   | 56                               | 5 | 3000  |
| AA24 |      |                                  |   |       |
| AA25 |      |                                  |   |       |
| AA26 |      |                                  |   |       |
| AA27 |      |                                  |   |       |
| AA28 |      |                                  |   |       |
| ZA29 |      |                                  |   |       |
| AA30 |      |                                  |   |       |
| AA31 |      |                                  |   |       |
| AA32 |      |                                  |   |       |
| AA33 | 11   | 56                               | 5 | 10000 |
| AA34 |      |                                  |   |       |
| AA35 |      |                                  |   |       |
| ZA36 |      |                                  |   |       |
| AA37 |      |                                  |   |       |
| AA38 |      |                                  |   |       |
| AA39 | 10.5 | 53.5                             | 5 | 3000  |
| AA40 |      |                                  |   |       |
| AA41 |      |                                  |   |       |
| AA42 |      |                                  |   |       |
| AA43 | 10.5 | 53.5                             | 5 | 5000  |
